# Supplementary material for: Halogen Bond-Involving Self-Assembly of Iodonium Carboxylates: Adding a Dimension to Supramolecular Architecture
Source: MDPI journal article supplement (doi:10.3390/ijms241914642), 2023-09-27
Supplement: s1 [file s1]

## SUPPORTING INFORMATION

### Halogen Bond-Involving Self-assembly of Iodonium Carboxylates:

### Adding a Dimension to Supramolecular Architecture

Amirbek D. Radzhabov,<sup>1</sup> Alyona I. Ledneva,<sup>1</sup> Natalia S. Soldatova,<sup>1</sup> Irina I. Fedorova,<sup>2,3</sup> Daniil M. Ivanov,<sup>1,2</sup> Alexey A. Ivanov,<sup>1</sup> Mekhman S. Yusubov,<sup>1</sup> Vadim Yu. Kukushkin,<sup>2,4</sup> Pavel S. Postnikov<sup>1,5\*</sup>

- 1 Research School of Chemistry and Applied Biomedical Sciences, Tomsk Polytechnic University, Tomsk 634034, Russian Federation
- 2 Institute of Chemistry, Saint Petersburg State University, Saint Petersburg 199034, Russian Federation
- 3 Department of Mathematics and Mechanics, Saint Petersburg State University, Saint Petersburg 199034, Russian Federation
- 4 Institute of Chemistry and Pharmaceutical Technologies, Altai State University, 656049 Barnaul, Russia;
- 5 Department of Solid State Engineering, Institute of Chemical Technology, Prague 16628, Czech Republic

\* Correspondence: postnikov@tpu.ru

#### Table of contents

|                                                                                                                                                                                                                                                                                                                                                                                                                                                                                                                                                      |     |
|------------------------------------------------------------------------------------------------------------------------------------------------------------------------------------------------------------------------------------------------------------------------------------------------------------------------------------------------------------------------------------------------------------------------------------------------------------------------------------------------------------------------------------------------------|-----|
| <b>Table S1.</b> Geometrical parameters of C–X···Y (X = Cl, Br) XBs in the structures of <b>1–3</b> . .....                                                                                                                                                                                                                                                                                                                                                                                                                                          | S2  |
| <b>Table S2.</b> Parameters in (3, –1) bond critical points (the electron density with sign of $\lambda_2$ $\text{sign}(\lambda_2)\rho(r)$ in $e/\text{bohr}^3$ , Laplacian of electron density $\nabla^2\rho(r)$ in $e/\text{bohr}^5$ , the local electronic energy density $H_b$ , local electronic potential energy density $V(r)$ , local electronic kinetic energy density $G(r)$ in hartrees/ $\text{bohr}^3$ ) corresponding to the Cl···Cl (Br···Br), Cl···C (Br···C), Cl···O (Br···O) XBs and HBs in crystal models of all structures. .... | S2  |
| <b>Figure S1.</b> XB C–X···Y in <b>1a</b> (A) and <b>1b</b> (B). ....                                                                                                                                                                                                                                                                                                                                                                                                                                                                                | S3  |
| <b>Figure S2.</b> XB C–X···Y in <b>3a</b> (A, C) and <b>3b</b> (B, D). ....                                                                                                                                                                                                                                                                                                                                                                                                                                                                          | S3  |
| <b>Table S3.</b> Crystal structure refinement. ....                                                                                                                                                                                                                                                                                                                                                                                                                                                                                                  | S4  |
| Crystal growth .....                                                                                                                                                                                                                                                                                                                                                                                                                                                                                                                                 | S5  |
| Synthetic procedures.....                                                                                                                                                                                                                                                                                                                                                                                                                                                                                                                            | S5  |
| NMR spectra of <b>1a,b</b> and <b>3a,b</b> .....                                                                                                                                                                                                                                                                                                                                                                                                                                                                                                     | S8  |
| Processing of Cambridge Structure Database .....                                                                                                                                                                                                                                                                                                                                                                                                                                                                                                     | S16 |
| References .....                                                                                                                                                                                                                                                                                                                                                                                                                                                                                                                                     | S17 |

**Table S1.** Geometrical parameters of C–X···Y (X = Cl, Br) XBs in the structures of **1–3**.

| Cation type <sup>a</sup> | XB             | <i>d</i> (C–X···Y) | ∠(C–X···Y) | Nc <sup>b</sup> | <i>d</i> (C–X···Y) | ∠(C–X···Y) | Nc <sup>b</sup> |
|--------------------------|----------------|--------------------|------------|-----------------|--------------------|------------|-----------------|
|                          |                | <b>1a</b>          |            |                 | <b>1b</b>          |            |                 |
| A                        | C4–X1···X2B    | 3.5223(17)         | 171.99(14) | 1.01            | 3.5522(12)         | 173.00(19) | 0.96            |
| B                        | C10B–X2B···X1B | 3.5513(17)         | 163.54(16) | 1.01            | 3.5578(12)         | 168.7(2)   | 0.96            |
|                          |                | <b>3a</b>          |            |                 | <b>3b</b>          |            |                 |
| A                        | C4–X1···X2     | 3.539(3)           | 176.6(3)   | 1.01            | 3.5969(11)         | 175.8(2)   | 0.97            |
| B                        | C4B–X1B···O1A  | 3.090(6)           | 154.6(3)   | 0.94            | 3.078(5)           | 155.4(2)   | 0.91            |
| C                        | -              | -                  | -          | -               | -                  | -          | -               |

**Table S2.** Parameters in (3, –1) bond critical points (the electron density with sign of  $\lambda_2$   $\text{sign}(\lambda_2)\rho(r)$  in  $e/\text{bohr}^3$ , Laplacian of electron density  $\nabla^2\rho(r)$  in  $e/\text{bohr}^5$ , the local electronic energy density  $H_b$ , local electronic potential energy density  $V(r)$ , local electronic kinetic energy density  $G(r)$  in hartrees/ $\text{bohr}^3$ ) corresponding to the Cl···Cl (Br···Br), Cl···C (Br···C), Cl···O (Br···O) XBs and HBs in crystal models of all structures.

| Structure | Contact     | <i>l</i> | $\text{sign}(\lambda_2)\rho(r)$ | $\nabla^2\rho(r)$ | <i>V</i> (r) | <i>G</i> (r) | <i>H<sub>b</sub></i> |
|-----------|-------------|----------|---------------------------------|-------------------|--------------|--------------|----------------------|
| <b>1a</b> | Cl1···Cl2B  | 3.522    | –0.0058                         | 0.0203            | –0.0026      | 0.0038       | 0.0012               |
|           | Cl2B···Cl1B | 3.551    | –0.0056                         | 0.0192            | –0.0025      | 0.0036       | 0.0012               |
| <b>1b</b> | Br1···Br2B  | 3.552    | –0.0080                         | 0.0275            | –0.0038      | 0.0054       | 0.0015               |
|           | Br2B···Br1B | 3.558    | –0.0080                         | 0.0273            | –0.0038      | 0.0053       | 0.0015               |
| <b>2a</b> | Cl1···C11   | 3.182    | –0.0080                         | 0.0295            | –0.0040      | 0.0057       | 0.0017               |
|           | Cl2···C5    | 3.355    | –0.0067                         | 0.0235            | –0.0032      | 0.0045       | 0.0014               |
| <b>2b</b> | Br1···C11   | 3.249    | –0.0085                         | 0.0295            | –0.0043      | 0.0058       | 0.0015               |
|           | Br2···C5    | 3.392    | –0.0072                         | 0.0251            | –0.0036      | 0.0049       | 0.0013               |
| <b>3a</b> | Cl1···Cl2   | 3.539    | –0.0057                         | 0.0198            | –0.0026      | 0.0038       | 0.0012               |
|           | Cl1B···O1A  | 3.090    | –0.0088                         | 0.0365            | –0.0049      | 0.0070       | 0.0021               |
|           | H1SA···O2A  | 1.769    | –0.0378                         | 0.1180            | –0.0325      | 0.0310       | –0.0015              |
|           | H1SB···O2S  | 1.781    | –0.0368                         | 0.1118            | –0.0309      | 0.0294       | –0.0015              |
|           | H2SB···O6A  | 1.767    | –0.0369                         | 0.1232            | –0.0327      | 0.0317       | –0.0009              |
|           | H2SA···O3A  | 1.930    | –0.0259                         | 0.0885            | –0.0201      | 0.0211       | 0.0010               |
| <b>3b</b> | Br1···Br2   | 3.597    | –0.0074                         | 0.0255            | –0.0035      | 0.0049       | 0.0014               |
|           | Br1B···O1A  | 3.078    | –0.0108                         | 0.0435            | –0.0067      | 0.0088       | 0.0021               |
|           | H1SA···O2A  | 1.737    | –0.0404                         | 0.1217            | –0.0353      | 0.0328       | –0.0024              |
|           | H1SB···O2S  | 1.824    | –0.0339                         | 0.1032            | –0.0275      | 0.0266       | –0.0008              |
|           | H2SA···O6A  | 1.713    | –0.0426                         | 0.1296            | –0.0385      | 0.0354       | –0.0030              |
|           | H2SB···O3A  | 1.869    | –0.0288                         | 0.0956            | –0.0229      | 0.0234       | 0.0005               |

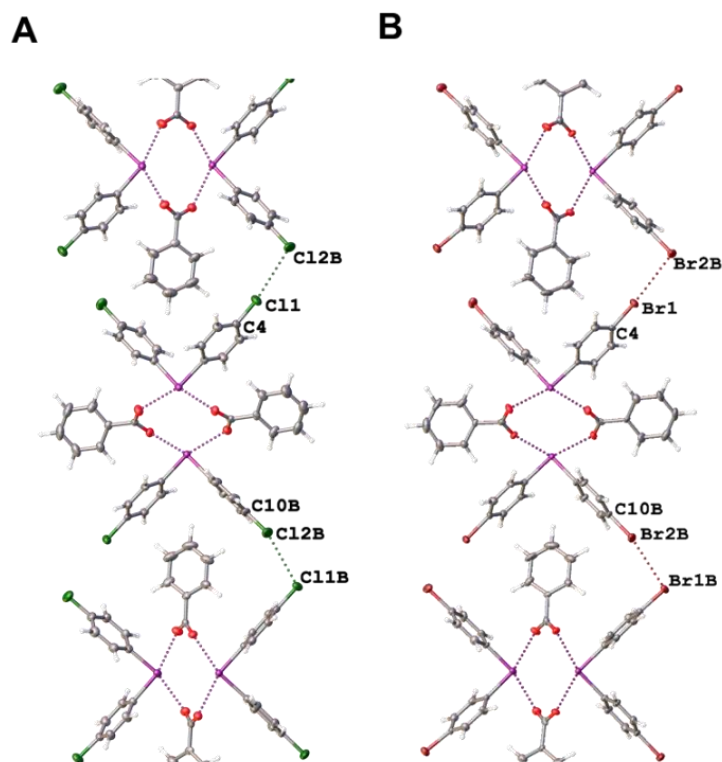

**Figure S1.** XB C–X...Y in **1a** (A) and **1b** (B).

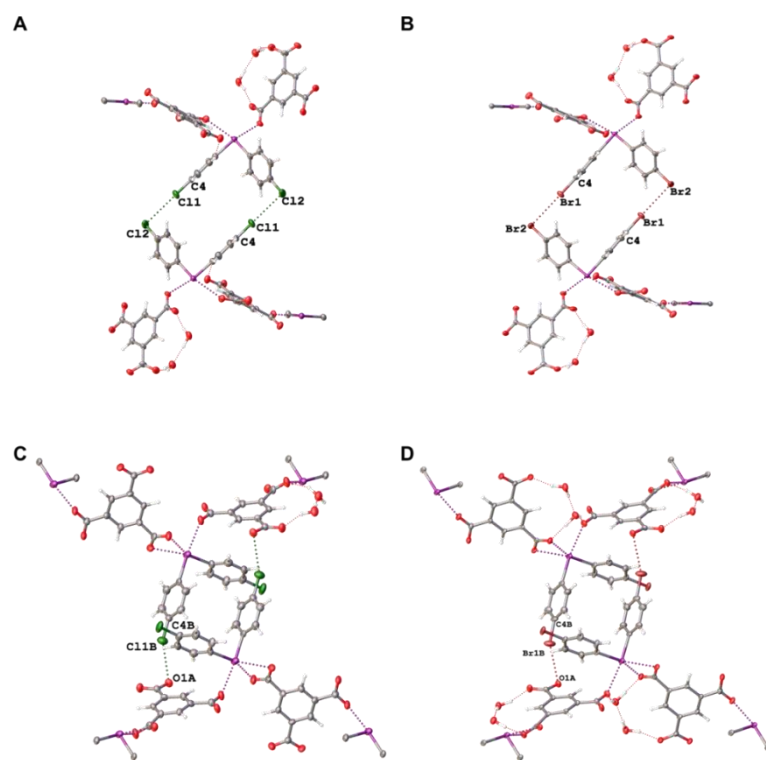

**Figure S2.** XB C–X...Y in **3a** (A, C) and **3b** (B, D).

**Table S3.** Crystal structure refinement.

| Identification code                                     | <b>1a</b>                                                           | <b>1b</b>                                                           | <b>2a</b>                                                                     | <b>2b</b>                                                                     | <b>3a</b>                                                                     | <b>3b</b>                                                                     |
|---------------------------------------------------------|---------------------------------------------------------------------|---------------------------------------------------------------------|-------------------------------------------------------------------------------|-------------------------------------------------------------------------------|-------------------------------------------------------------------------------|-------------------------------------------------------------------------------|
| CCDC number                                             | 2291471                                                             | 2291472                                                             | 2291473                                                                       | 2291475                                                                       | 2291476                                                                       | 2291477                                                                       |
| Empirical formula                                       | C <sub>19</sub> H <sub>13</sub> Cl <sub>2</sub> IO <sub>2</sub>     | C <sub>19</sub> H <sub>13</sub> Br <sub>2</sub> IO <sub>2</sub>     | C <sub>32</sub> H <sub>20</sub> Cl <sub>4</sub> I <sub>2</sub> O <sub>4</sub> | C <sub>32</sub> H <sub>20</sub> Br <sub>4</sub> I <sub>2</sub> O <sub>4</sub> | C <sub>45</sub> H <sub>31</sub> Cl <sub>6</sub> I <sub>3</sub> O <sub>8</sub> | C <sub>45</sub> H <sub>31</sub> Br <sub>6</sub> I <sub>3</sub> O <sub>8</sub> |
| Formula weight                                          | 471.11                                                              | 1120.03                                                             | 864.08                                                                        | 1041.92                                                                       | 1293.10                                                                       | 1559.86                                                                       |
| Temperature, K                                          | 100(2)                                                              | 100(2)                                                              | 100(2)                                                                        | 100(2)                                                                        | 100(2)                                                                        | 100(2)                                                                        |
| Crystal system                                          | orthorhombic                                                        | orthorhombic                                                        | triclinic                                                                     | triclinic                                                                     | monoclinic                                                                    | monoclinic                                                                    |
| Space group                                             | Pbca                                                                | Pbca                                                                | P-1                                                                           | P-1                                                                           | P2 <sub>1</sub> /n                                                            | P2 <sub>1</sub> /n                                                            |
| a, Å                                                    | 19.8620(6)                                                          | 20.2173(9)                                                          | 7.3451(4)                                                                     | 7.5887(5)                                                                     | 11.7190(2)                                                                    | 11.8708(2)                                                                    |
| b, Å                                                    | 9.2439(2)                                                           | 9.1860(5)                                                           | 9.6604(5)                                                                     | 9.5201(7)                                                                     | 28.4879(6)                                                                    | 28.5948(4)                                                                    |
| c, Å                                                    | 40.3145(11)                                                         | 40.790(2)                                                           | 10.9579(5)                                                                    | 11.0650(7)                                                                    | 14.0194(3)                                                                    | 14.2162(2)                                                                    |
| $\alpha$ , °                                            | 90                                                                  | 90                                                                  | 104.536(4)                                                                    | 77.605(6)                                                                     | 90                                                                            | 90                                                                            |
| $\beta$ , °                                             | 90                                                                  | 90                                                                  | 90.659(4)                                                                     | 88.895(5)                                                                     | 96.078(2)                                                                     | 95.2910(10)                                                                   |
| $\gamma$ , °                                            | 90                                                                  | 90                                                                  | 99.660(5)                                                                     | 80.537(6)                                                                     | 90                                                                            | 90                                                                            |
| Volume, Å <sup>3</sup>                                  | 7401.90(3)                                                          | 7575.3(7)                                                           | 740.80(7)                                                                     | 770.03(9)                                                                     | 4654.06(16)                                                                   | 4805.03(13)                                                                   |
| Z                                                       | 8                                                                   | 8                                                                   | 1                                                                             | 1                                                                             | 4                                                                             | 4                                                                             |
| $\rho_{\text{calc}}$ , g/cm <sup>3</sup>                | 1.691                                                               | 1.964                                                               | 1.937                                                                         | 2.247                                                                         | 1.845                                                                         | 2.156                                                                         |
| $\mu$ , mm <sup>-1</sup>                                | 2.027                                                               | 5.918                                                               | 2.522                                                                         | 7.269                                                                         | 19.427                                                                        | 21.594                                                                        |
| F(000)                                                  | 3680.0                                                              | 4256.0                                                              | 418.0                                                                         | 490.0                                                                         | 2504.0                                                                        | 2936.0                                                                        |
| Crystal size, mm <sup>3</sup>                           | 0.7 × 0.3 × 0.08                                                    | 1.5 × 1 × 0.5                                                       | 0.18 × 0.12 × 0.08                                                            | 0.6 × 0.5 × 0.5                                                               | 0.18 × 0.15 × 0.13                                                            | 0.2 × 0.18 × 0.17                                                             |
| Radiation                                               | Mo K $\alpha$<br>( $\lambda$ = 0.71073)                             | Mo K $\alpha$<br>( $\lambda$ = 0.71073)                             | Mo K $\alpha$<br>( $\lambda$ = 0.71073)                                       | Mo K $\alpha$<br>( $\lambda$ = 0.71073)                                       | Cu K $\alpha$<br>( $\lambda$ = 1.54184)                                       | Cu K $\alpha$<br>( $\lambda$ = 1.54184)                                       |
| 2 $\Theta$ range for data collection, °                 | 4.532 to 57.538                                                     | 4.474 to 57.158                                                     | 5.064 to 58.676                                                               | 4.44 to 57.27                                                                 | 6.206 to 134.996                                                              | 6.182 to 129.974                                                              |
| Index ranges                                            | -20 ≤ h ≤ 26,<br>-12 ≤ k ≤ 12,<br>-52 ≤ l ≤ 50                      | -16 ≤ h ≤ 25,<br>-10 ≤ k ≤ 11,<br>-47 ≤ l ≤ 54                      | -8 ≤ h ≤ 9,<br>-11 ≤ k ≤ 12,<br>-14 ≤ l ≤ 14                                  | -10 ≤ h ≤ 9,<br>-12 ≤ k ≤ 12,<br>-14 ≤ l ≤ 14                                 | -14 ≤ h ≤ 13,<br>-34 ≤ k ≤ 33,<br>-16 ≤ l ≤ 15                                | -12 ≤ h ≤ 13,<br>-33 ≤ k ≤ 33,<br>-16 ≤ l ≤ 14                                |
| Reflections collected                                   | 45164                                                               | 36807                                                               | 6076                                                                          | 9155                                                                          | 51478                                                                         | 41302                                                                         |
| Independent reflections                                 | 8636<br>[R <sub>int</sub> = 0.0539,<br>R <sub>sigma</sub> = 0.0517] | 8713<br>[R <sub>int</sub> = 0.0869,<br>R <sub>sigma</sub> = 0.0995] | 3384<br>[R <sub>int</sub> = 0.0239,<br>R <sub>sigma</sub> = 0.0447]           | 3433<br>[R <sub>int</sub> = 0.0285,<br>R <sub>sigma</sub> = 0.0342]           | 8339<br>[R <sub>int</sub> = 0.1651,<br>R <sub>sigma</sub> = 0.0809]           | 8172<br>[R <sub>int</sub> = 0.0946,<br>R <sub>sigma</sub> = 0.0508]           |
| Data/restraints/parameters                              | 8636/0/433                                                          | 8713/0/427                                                          | 3384/0/190                                                                    | 3433/0/190                                                                    | 8339/2/565                                                                    | 8172/2/565                                                                    |
| Goodness-of-fit on F <sup>2</sup>                       | 1.037                                                               | 1.027                                                               | 1.046                                                                         | 1.057                                                                         | 1.060                                                                         | 1.027                                                                         |
| Final R indexes [ $I \geq 2\sigma(I)$ ]                 | R <sub>1</sub> = 0.0428,<br>wR <sub>2</sub> = 0.0830                | R <sub>1</sub> = 0.0628,<br>wR <sub>2</sub> = 0.0998                | R <sub>1</sub> = 0.0274,<br>wR <sub>2</sub> = 0.0558                          | R <sub>1</sub> = 0.0254,<br>wR <sub>2</sub> = 0.0510                          | R <sub>1</sub> = 0.0597, wR <sub>2</sub> =<br>0.1565                          | R <sub>1</sub> = 0.0461, wR <sub>2</sub> =<br>0.1171                          |
| Final R indexes [all data]                              | R <sub>1</sub> = 0.0680,<br>wR <sub>2</sub> = 0.0910                | R <sub>1</sub> = 0.1098,<br>wR <sub>2</sub> = 0.1121                | R <sub>1</sub> = 0.0320,<br>wR <sub>2</sub> = 0.0582                          | R <sub>1</sub> = 0.0318,<br>wR <sub>2</sub> = 0.0526                          | R <sub>1</sub> = 0.0735, wR <sub>2</sub> =<br>0.1673                          | R <sub>1</sub> = 0.0500, wR <sub>2</sub> =<br>0.1200                          |
| Largest diff. peak/hole, e <sup>-</sup> Å <sup>-3</sup> | 0.90/-0.62                                                          | 0.94/-1.23                                                          | 1.35/-0.68                                                                    | 1.19/-0.91                                                                    | 2.16/-1.97                                                                    | 2.84/-1.24                                                                    |

## Crystal growth

### *Diaryliodonium benzoates 1.*

Crystals of **1** were grown by slow evaporation of methanol solution of **1** at ambient temperature.

### *Diaryliodonium terephthalates 2.*

Crystals of **2** were grown by slow diffusion of tetrabutylammonium terephthalate methanol solution to diaryliodonium trifluoromethanesulfonate methanol solution in ampule at ambient temperature. Solution of diaryliodonium salt was carefully added, avoiding significant mixing.

### *Diaryliodonium trimesates 3.*

Crystals of **3** suitable for X-Ray diffraction were grown by slow diffusion of tetrabutylammonium terephthalate solution in water/acetonitrile mixture (1:1) to diaryliodonium trifluoromethanesulfonate in acetonitrile at ambient temperature. Solution of diaryliodonium salt was carefully added, avoiding significant mixing.

## Synthetic procedures

**Synthesis of diaryliodonium benzoates 1.** A solution of a diaryliodonium trifluoromethanesulfonate [**1**] (1 mmol) in methanol/water mixture (1 mL) was added dropwise to solution of potassium benzoate (3 mmol, 481 mg) in water (5 mL) at RT, the reaction mixture was stirred for 30 min and the precipitate formed was filtered off and washed with water (3×5 mL). The obtained diaryliodonium benzoates **1** were dried under reduced pressure.

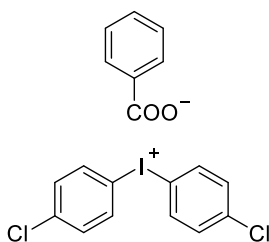

**bis(4-chlorophenyl)iodonium benzoate (1a).** The reaction of bis(4-chlorophenyl)iodonium trifluoromethanesulfonate (1 mmol, 499 mg) according to described procedure afforded 457 mg (97%) of **1a** isolated as the colorless crystalline solid; mp 152–153 °C. <sup>1</sup>H NMR (400 MHz, DMSO-*d*<sub>6</sub>) δ 8.18 (d, *J* = 8.8 Hz, 4H), 7.75 (d, *J* = 6.8 Hz, 2H), 7.52 (d, *J* = 8.4 Hz, 4H), 7.32–7.23 (m, 3H). <sup>13</sup>C{<sup>1</sup>H} (100 MHz, DMSO-*d*<sub>6</sub>) δ 169.7, 138.8, 136.8, 136.2, 131.1, 129.2, 129.0, 127.3, 118.9. HRMS (ESI+) *m/z* calcd. for [M]<sup>+</sup> C<sub>12</sub>H<sub>8</sub>Cl<sub>2</sub>I<sup>+</sup>: 348.9042, found 348.9045.

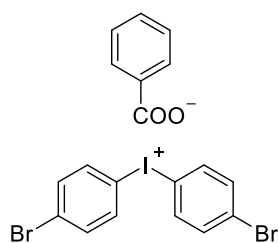

**bis(4-bromophenyl)iodonium benzoate (1b).** The reaction of bis(4-bromophenyl)iodonium trifluoromethanesulfonate (1 mmol, 588 mg) according to described procedure afforded 527 mg (94%) of **1b** isolated as the colorless crystalline solid; mp 158–159 °C.  $^1\text{H}$  NMR (400 MHz, DMSO- $d_6$ )  $\delta$  8.09 (d,  $J$  = 8.0 Hz, 4H), 7.79 (d,  $J$  = 6.8 Hz, 2H), 7.65 (d,  $J$  = 8.4 Hz, 4H), 7.37–7.28 (m, 3H).  $^{13}\text{C}\{^1\text{H}\}$  (100 MHz, DMSO- $d_6$ )  $\delta$  169.3, 136.9, 134.0, 129.9, 129.8, 129.0, 127.7, 125.1, 119.4. HRMS (ESI+)  $m/z$  calcd. for  $[\text{M}]^+$   $\text{C}_{12}\text{H}_8\text{Br}_2\text{I}^+$ : 436.8032, found 436.8039.

**Synthesis of diaryliodonium terephthalates 2.** To a solution of a diaryliodonium trifluoromethanesulfonate [1] (2.2 mmol) in methanol/water mixture (5 mL, 1:1) the solution of tetrabutylammonium terephthalate (1 mmol, 649 mg) in methanol (1 mL) was added dropwise at RT. The reaction mixture was stirred for 30 min and the precipitate formed was filtered off and washed with water (3×5 mL). The obtained diaryliodonium terephthalates **2** were dried under reduced pressure.

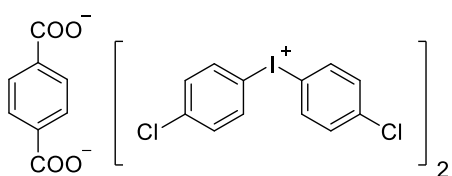

**bis(4-chlorophenyl)iodonium terephthalate (2a).** The reaction of bis(4-chlorophenyl)iodonium trifluoromethanesulfonate (2.2 mmol, 1.1 g) according to described procedure afforded 682 mg (79%) of **2a** isolated as the colorless crystalline solid; mp 200–202 °C. Elemental analysis (Found; C 43.43%, H 2.49%, Calcd. for  $\text{C}_{32}\text{H}_{20}\text{Cl}_4\text{I}_2\text{O}_4$ : C 44.48%, H 2.33%). HRMS (ESI+)  $m/z$  calcd. for  $[\text{M}]^+$   $\text{C}_{12}\text{H}_8\text{Cl}_2\text{I}^+$ : 348.9042, found 348.9042.

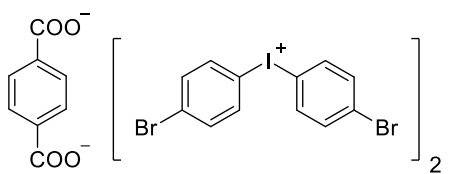

**bis(4-bromophenyl)iodonium terephthalate (2b).** The reaction of bis(4-bromophenyl)iodonium trifluoromethanesulfonate (2.2 mmol, 1.29 g) according to described procedure afforded 885 mg (85%) of **2b** isolated as the colorless crystalline solid; mp

191–193 °C. Elemental analysis (Found; C 36.82%, H 2.24%, Calcd. for C<sub>32</sub>H<sub>20</sub>Br<sub>4</sub>I<sub>2</sub>O<sub>4</sub>: C 36.89%, H 1.93%). HRMS (ESI+) *m/z* calcd. for [M]<sup>+</sup> C<sub>12</sub>H<sub>8</sub>Br<sub>2</sub>I<sup>+</sup>: 436.8032, found 436.8043.

**Synthesis of diaryliodonium trimesates 3.** To a solution of tetrabutylammonium trimesate (1 mmol, 934 mg) in water/acetonitrile mixture (5 mL, 1:1) a solution of diaryliodonium trifluoromethanesulfonate[1] (3.3 mmol) in acetonitrile (5 mL) was added dropwise at RT. The reaction mixture was stirred for 30 min and the precipitate formed was filtered off and washed with water (3×5 mL). The product **3** was dried in the air.

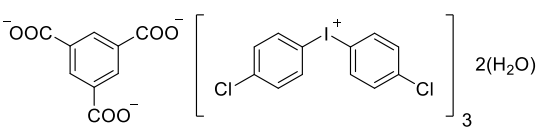 **bis(4-chlorophenyl)iodonium benzene-1,3,5-tricarboxylate dihydrate (3a).** The reaction of bis(4-chlorophenyl)iodonium trifluoromethanesulfonate (3.3 mmol, 1.65 g) according to described procedure afforded 905 mg (72%) of **3a** isolated as the colorless crystalline solid; mp 152–154 °C. <sup>1</sup>H NMR (400 MHz, DMSO-*d*<sub>6</sub>) δ 8.23–8.10 (m, 15H), 7.49 (d, *J* = 8.4 Hz, 12H). <sup>13</sup>C{<sup>1</sup>H} (100 MHz, DMSO-*d*<sub>6</sub>) δ 170.5, 136.7, 136.6, 135.9, 131.2, 130.9, 119.8. Elemental analysis (Found; C 42.18%, H 2.56%, Calcd. for C<sub>45</sub>H<sub>31</sub>Cl<sub>6</sub>I<sub>3</sub>O<sub>8</sub>: C 41.80%, H 2.42%). HRMS (ESI+) *m/z* calcd. for [M]<sup>+</sup> C<sub>12</sub>H<sub>8</sub>Cl<sub>2</sub>I<sup>+</sup>: 348.9042, found 348.9032.

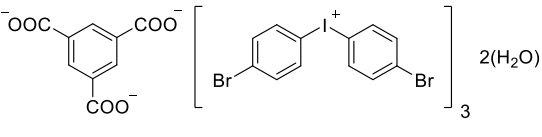 **bis(4-bromophenyl)iodonium benzene-1,3,5-tricarboxylate dihydrate (3b).** The reaction of bis(4-bromophenyl)iodonium trifluoromethanesulfonate (3.3 mmol, 1.94 g) according to described procedure afforded 1.26 g (83%) of **3b** isolated as the colorless crystalline solid; mp 146–148 °C. <sup>1</sup>H NMR (400 MHz, DMSO-*d*<sub>6</sub>) δ 8.17 (s, 3H), 8.07 (d, *J* = 8.4 Hz, 12H), 7.62 (d, *J* = 8.4 Hz, 12H). <sup>13</sup>C{<sup>1</sup>H} (100 MHz, DMSO-*d*<sub>6</sub>) δ 170.5, 136.8, 136.6, 133.8, 131.2, 124.7, 120.5. Elemental analysis (Found; C 34.73%, H 2.00%, Calcd. for C<sub>45</sub>H<sub>31</sub>Br<sub>6</sub>I<sub>3</sub>O<sub>8</sub>: C 34.65%, H 2.00%). HRMS (ESI+) *m/z* calcd. for [M]<sup>+</sup> C<sub>12</sub>H<sub>8</sub>Br<sub>2</sub>I<sup>+</sup>: 436.8032, found 436.8029.

# NMR spectra of **1a,b** and **3a,b**

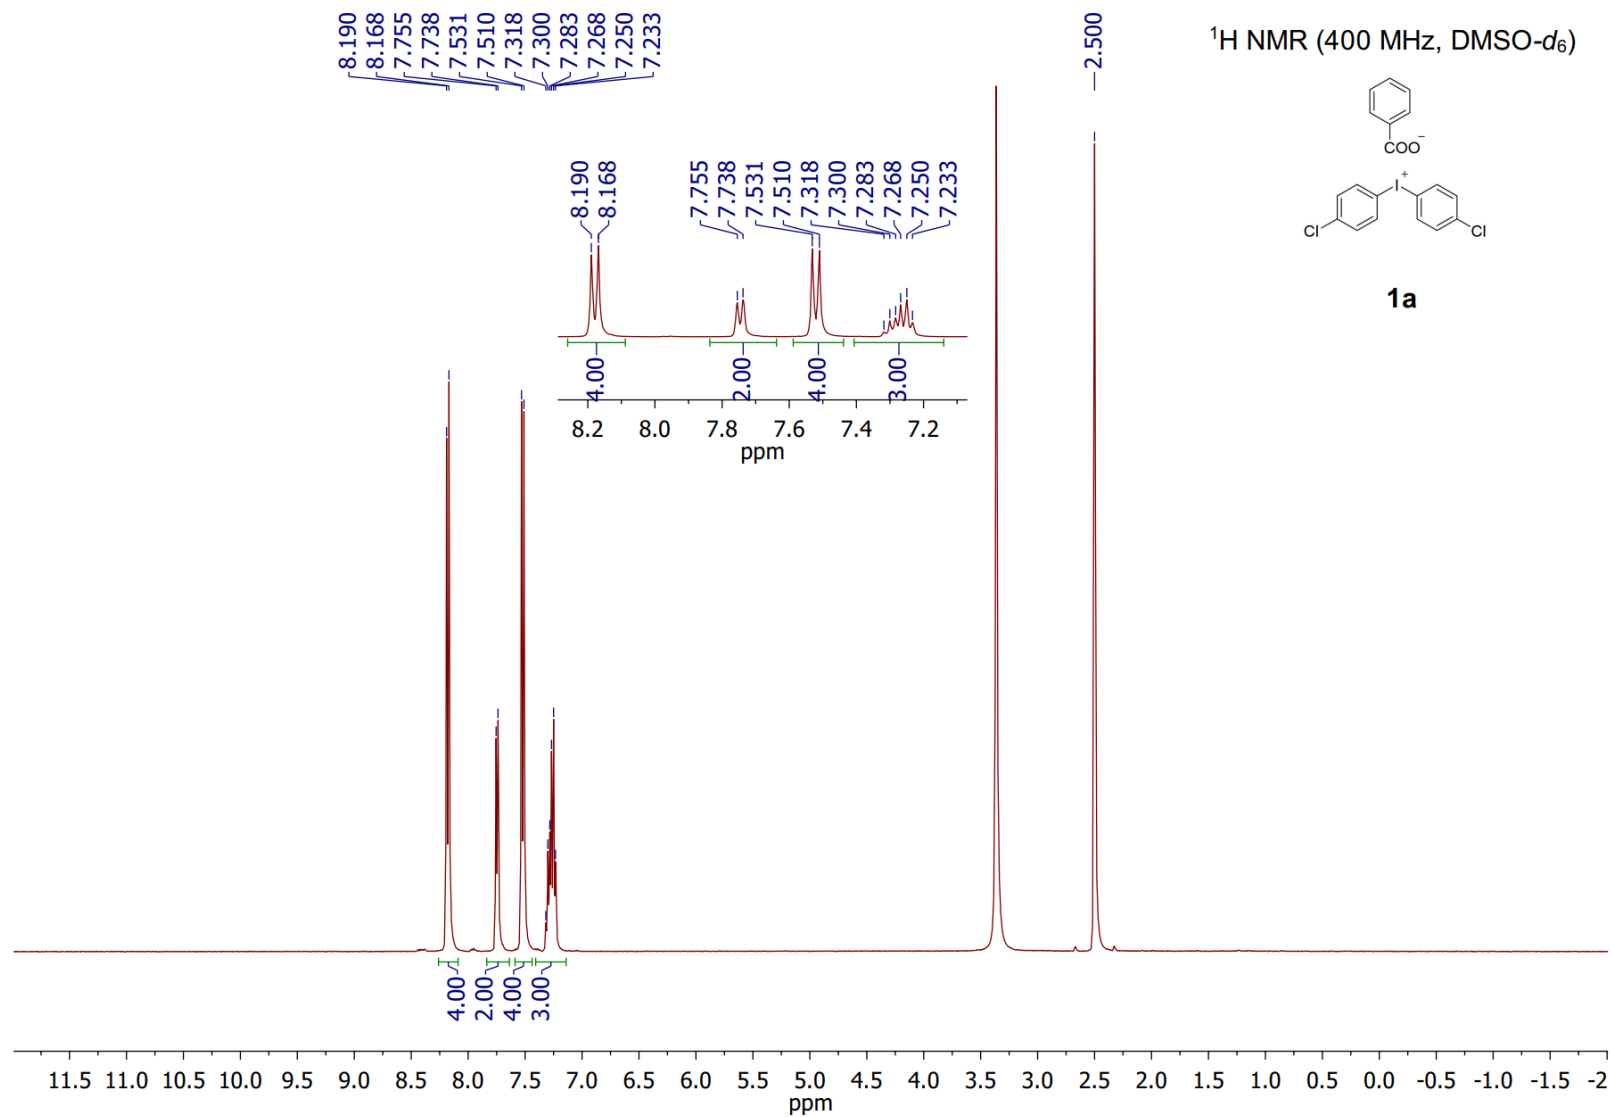



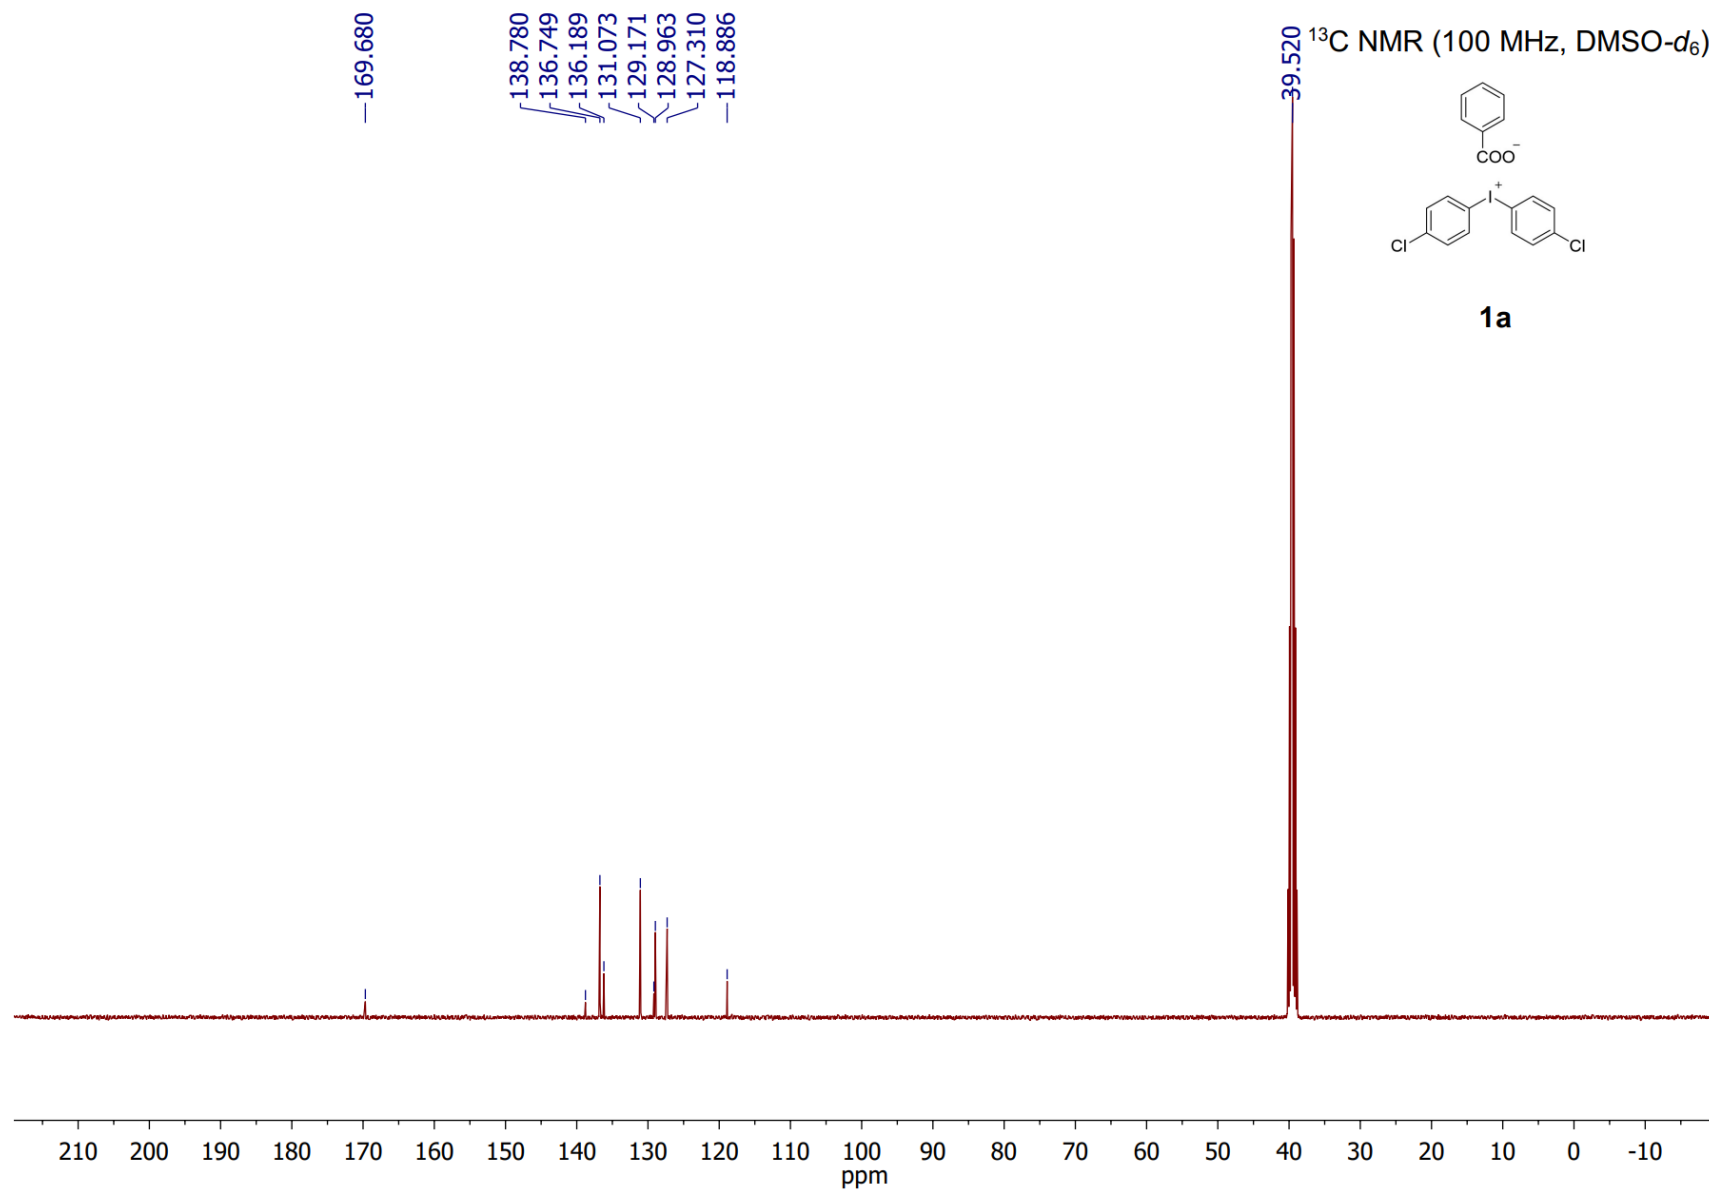

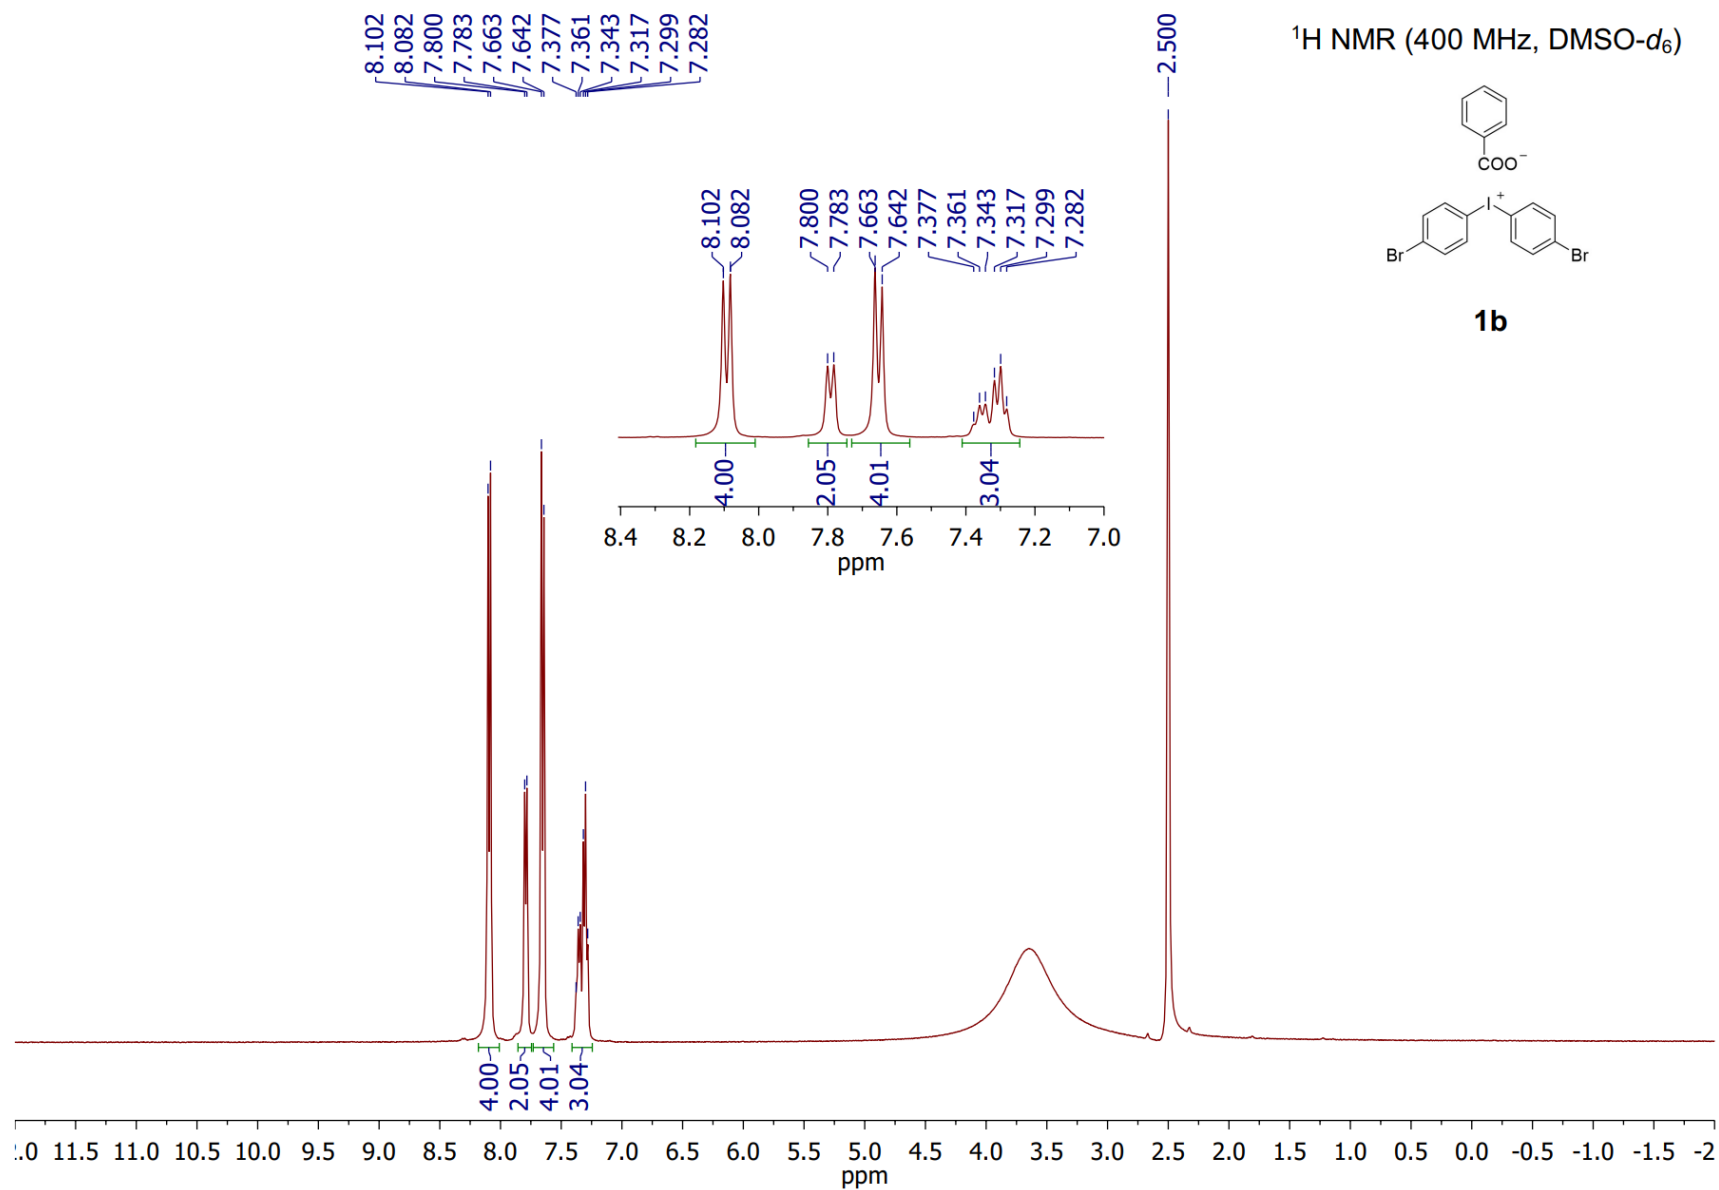

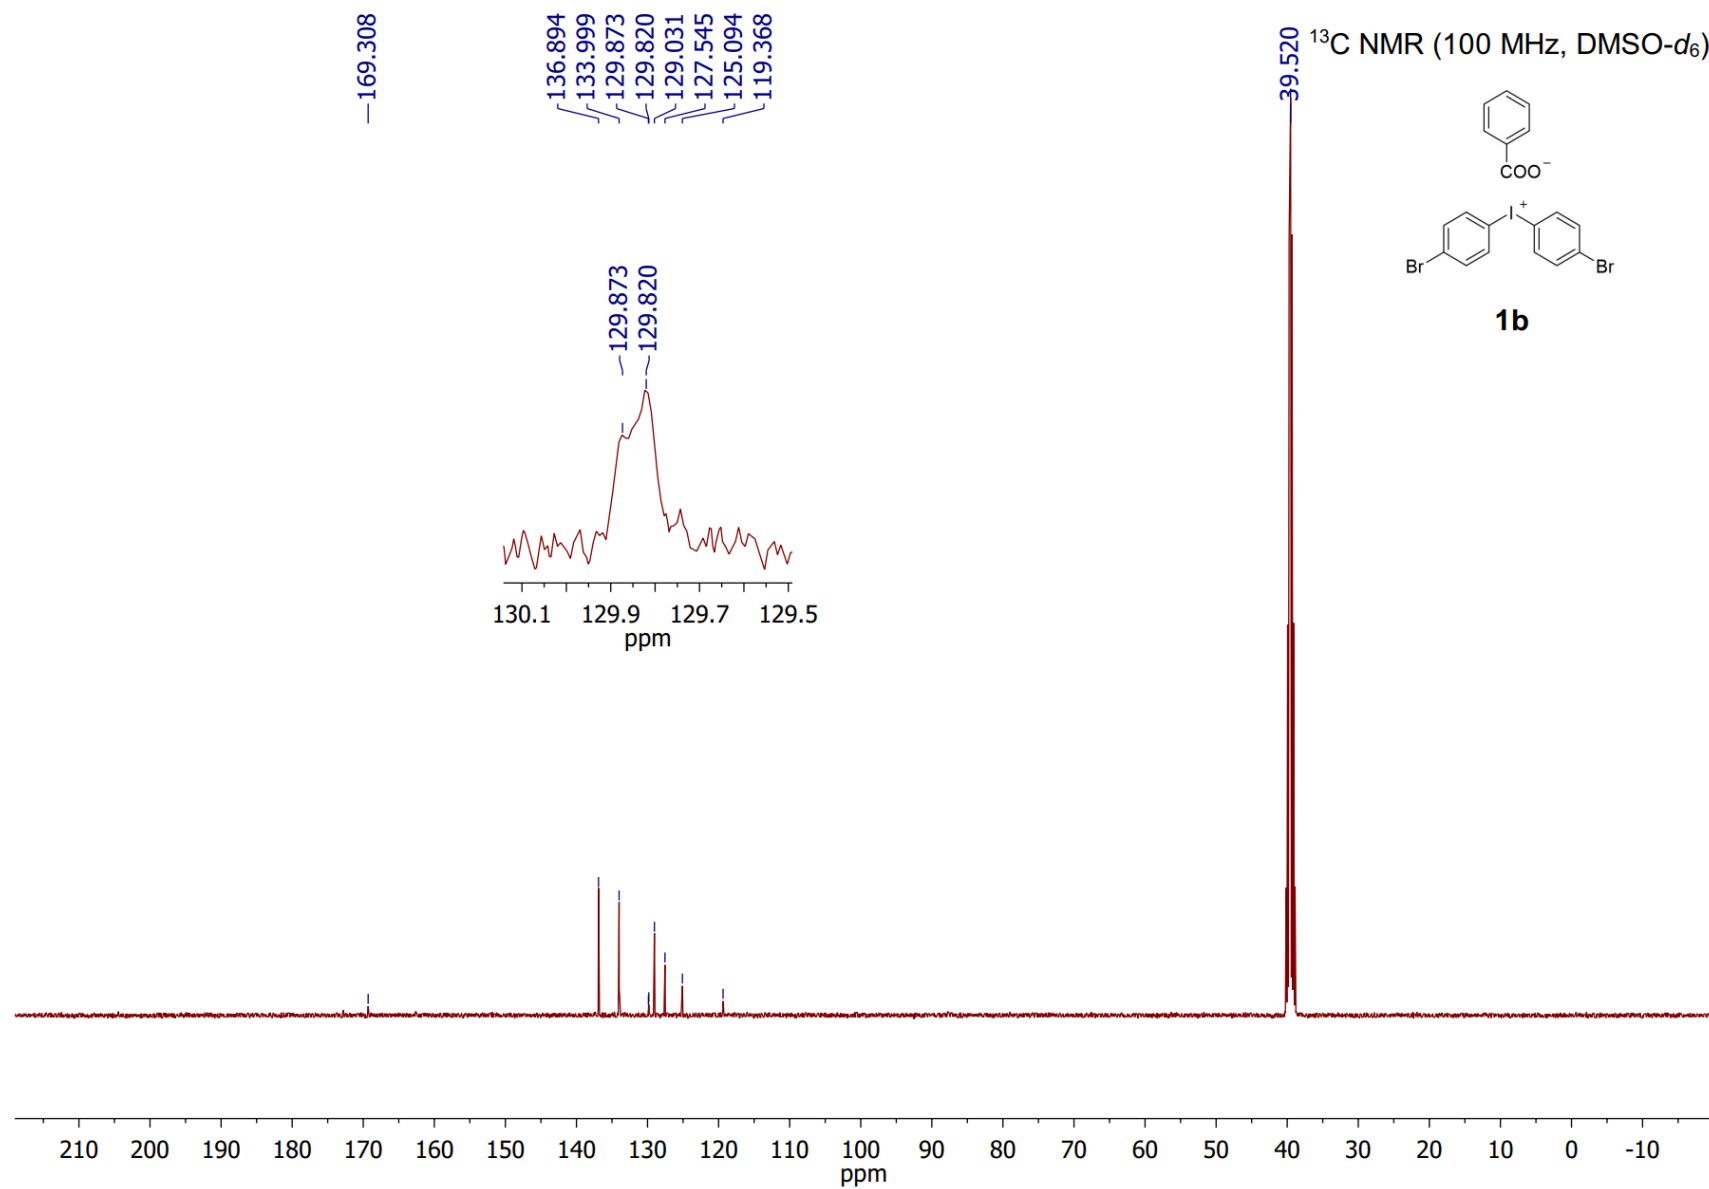

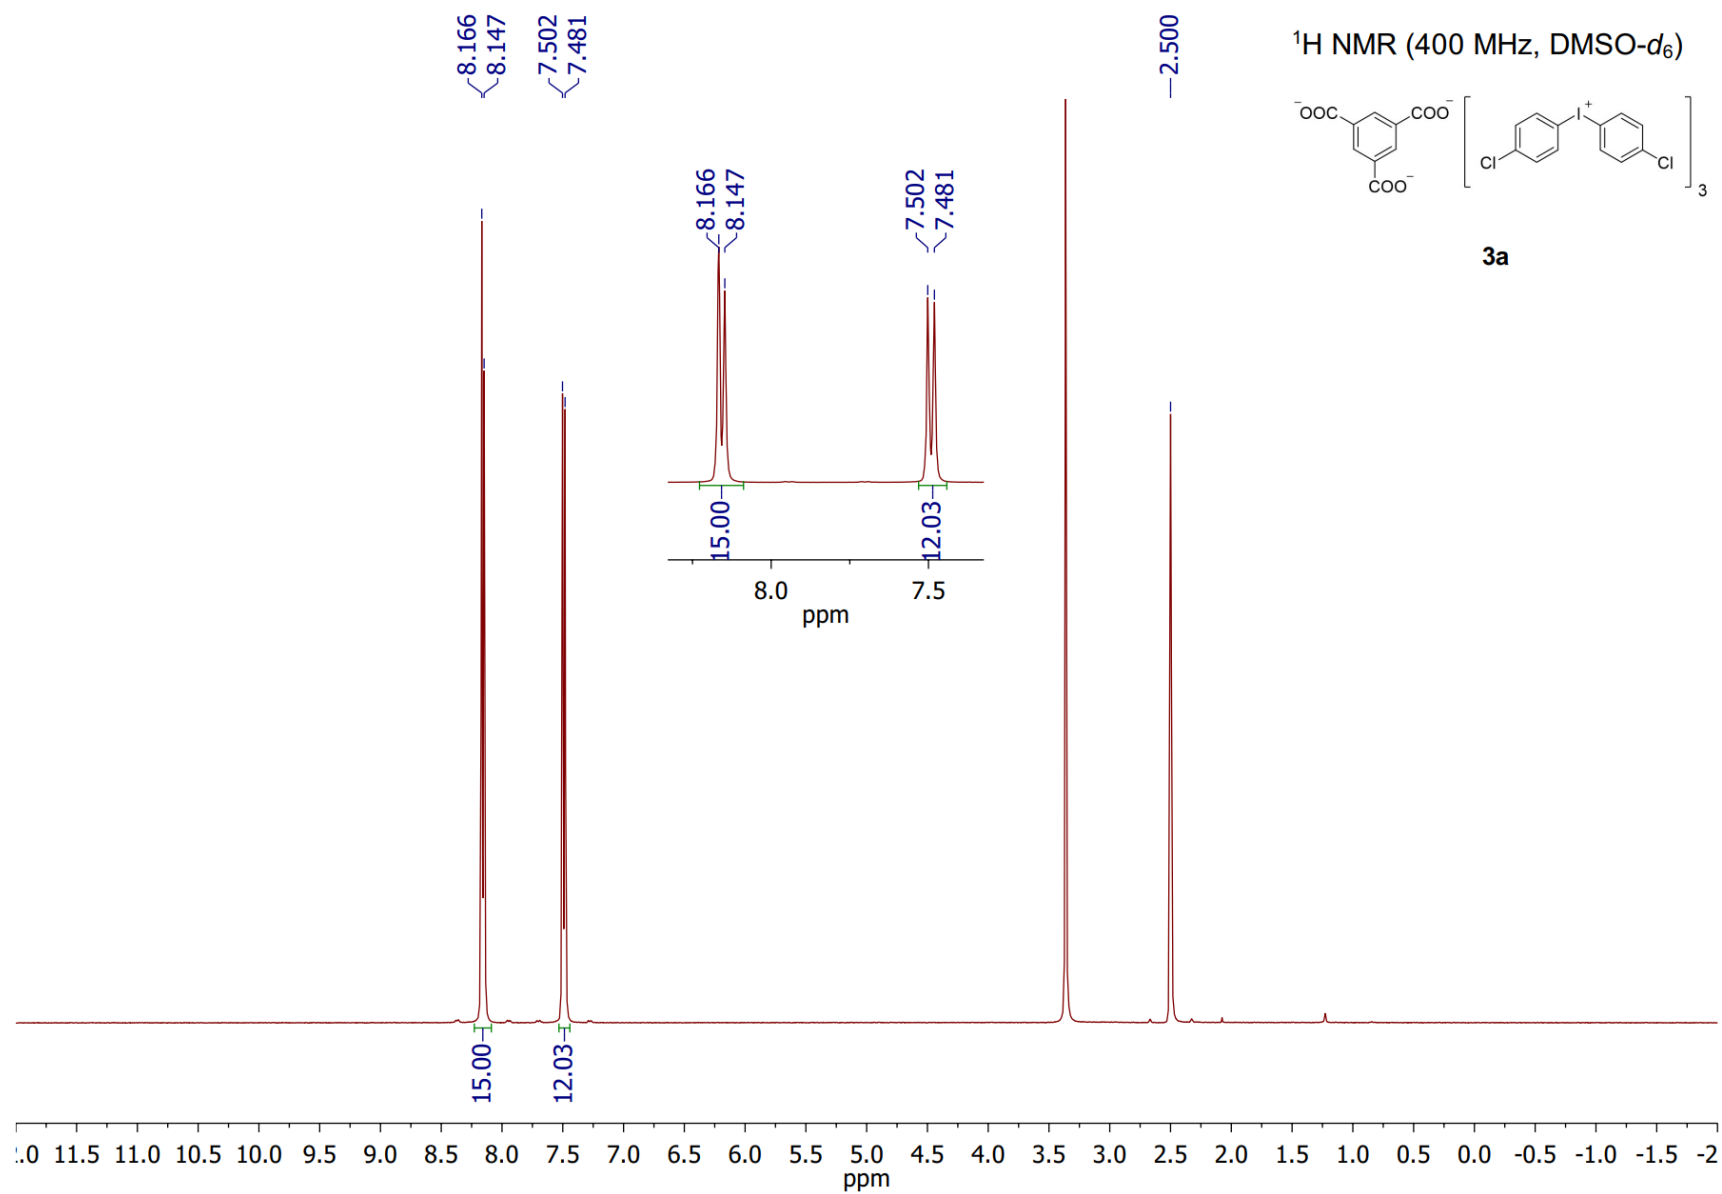

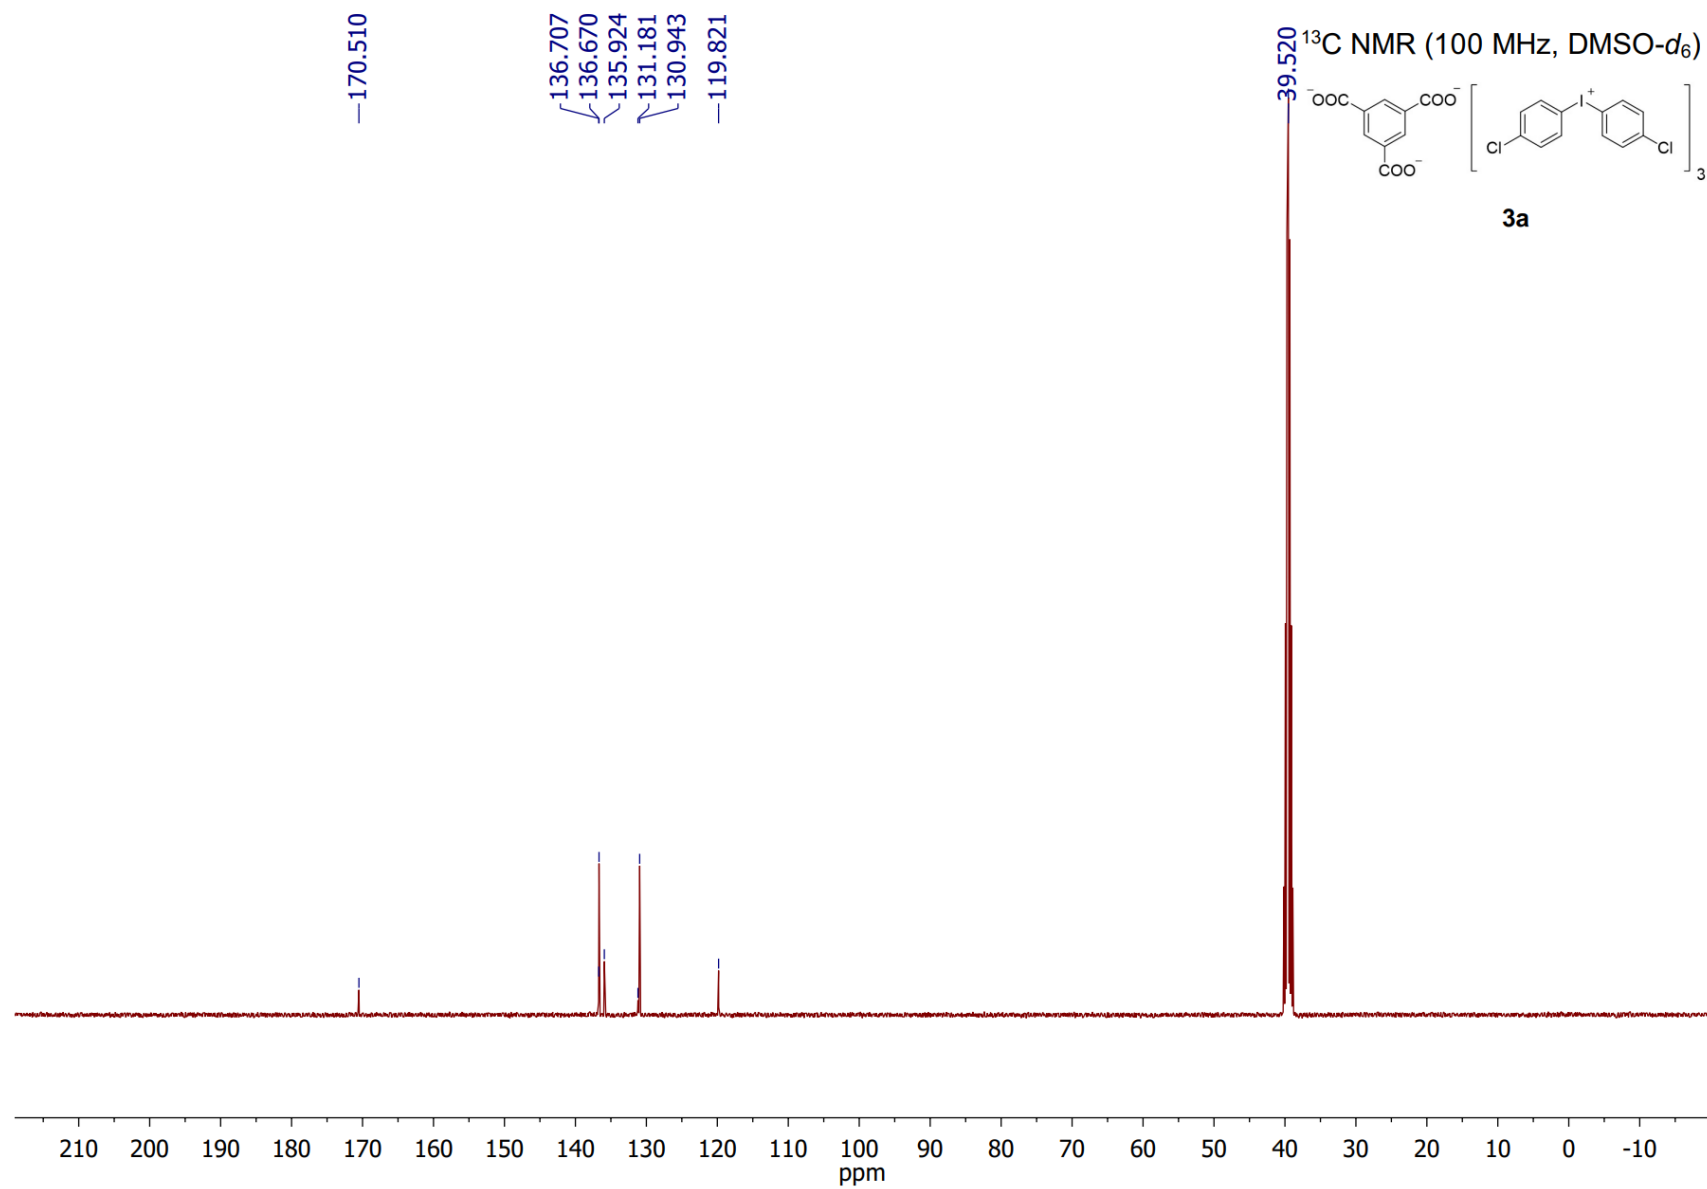

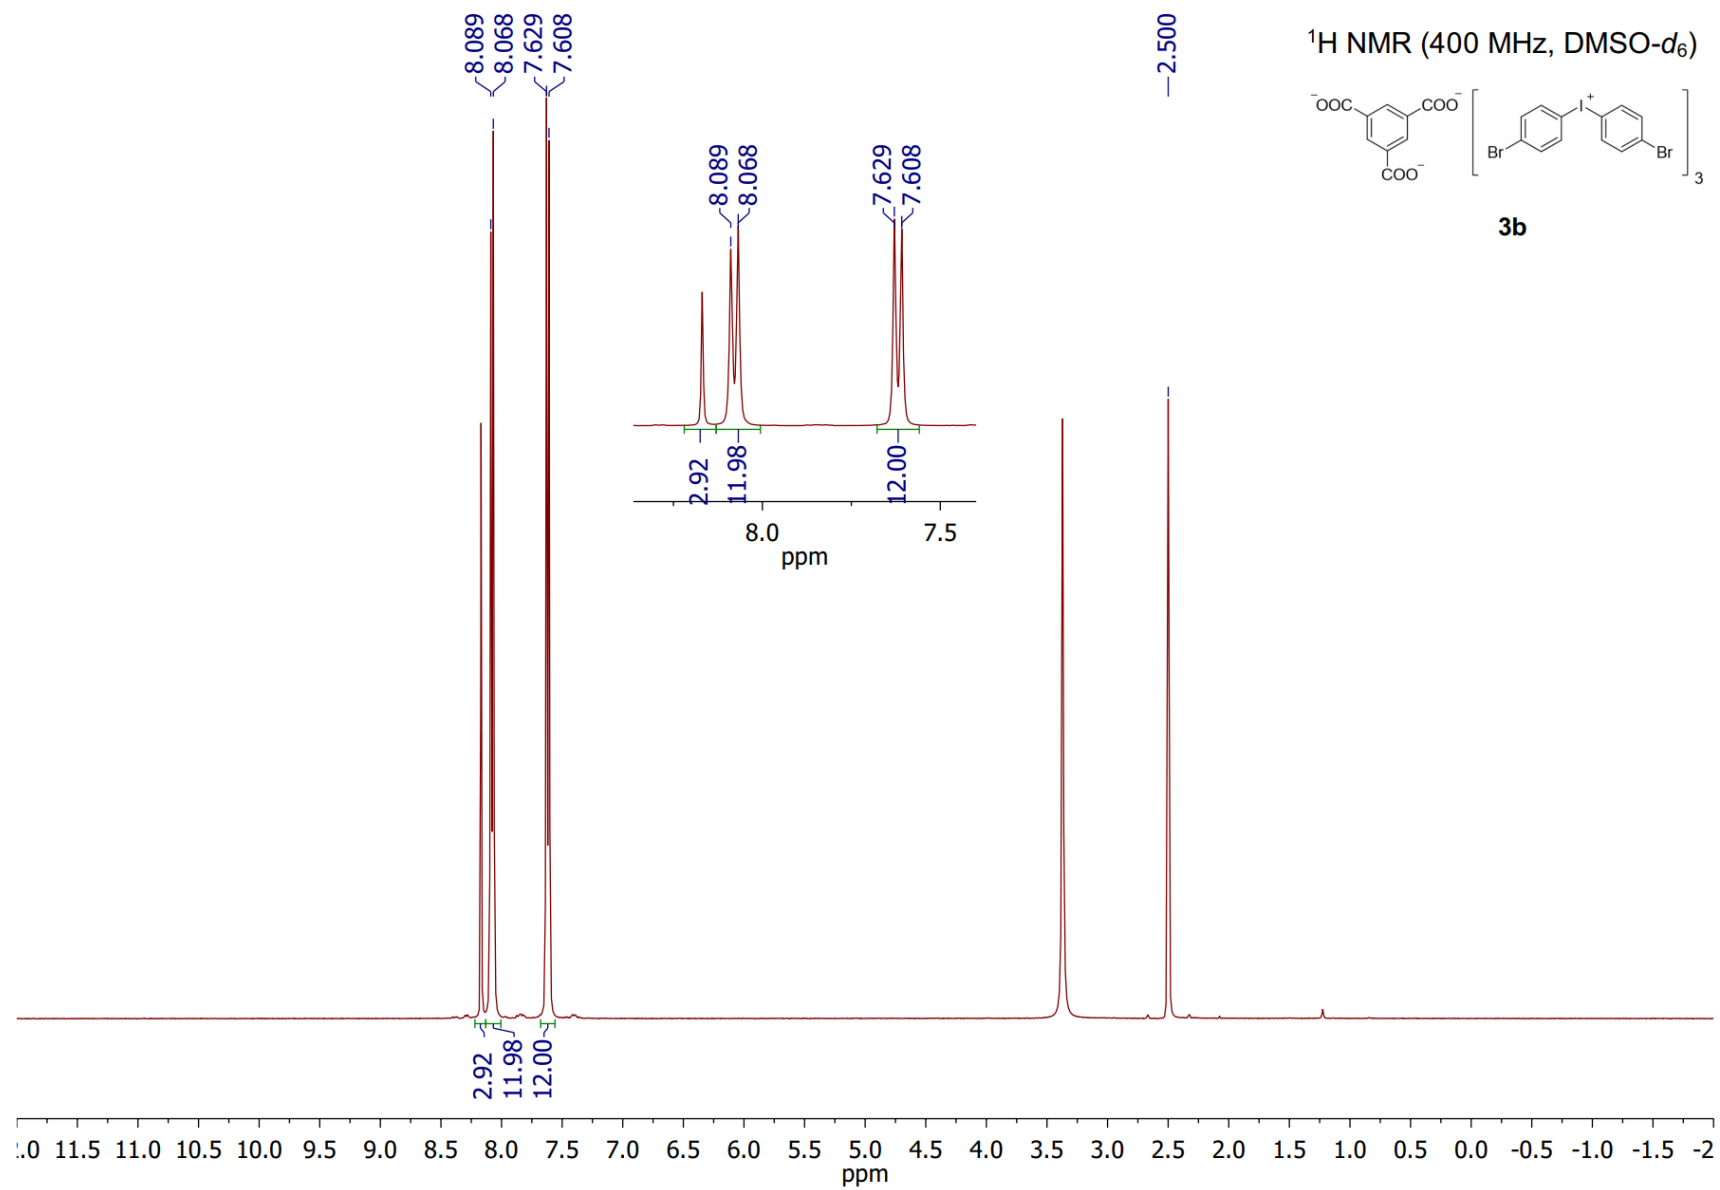

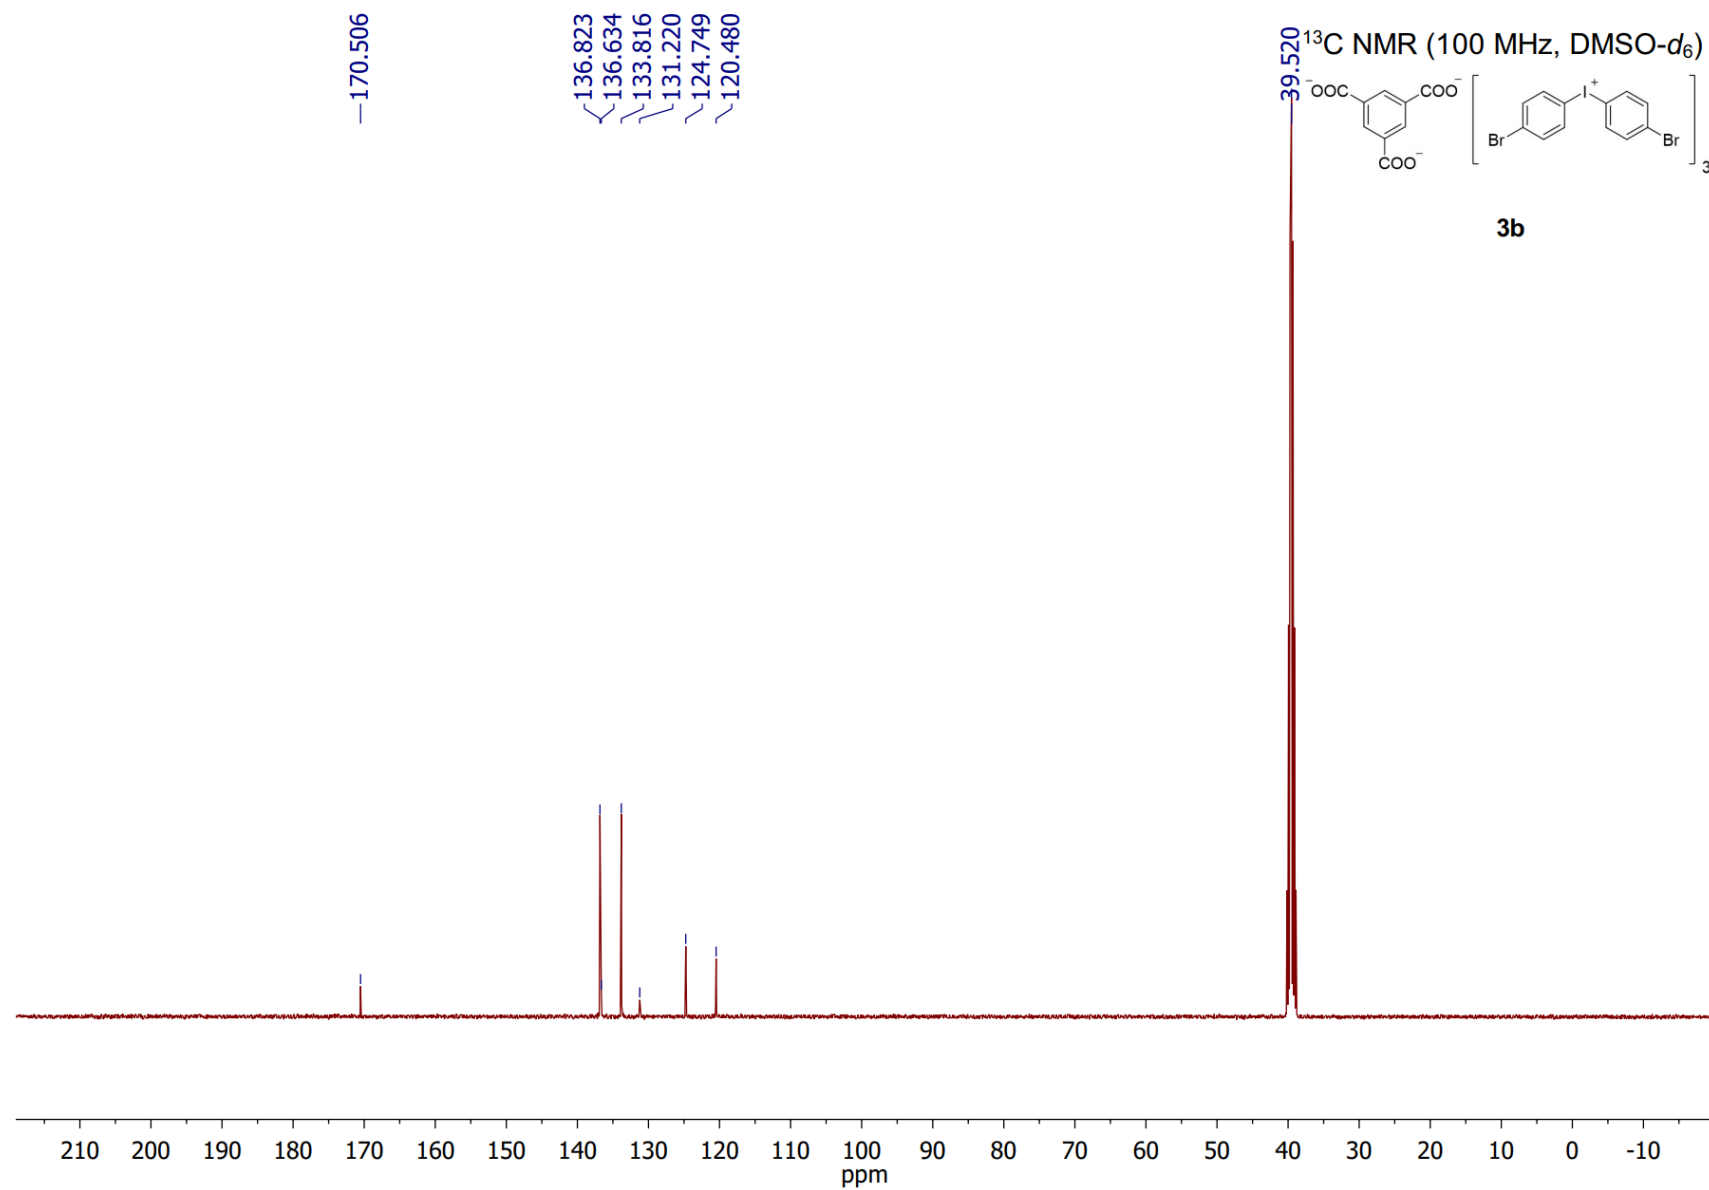

### **Processing of Cambridge Structure Database**

Processing of the Cambridge Structure Database (v 5.44) was performed using the ConQuest module (v 2023.2). To find accessible iodonium species, we analyzed 408 structures obtained by single-crystal XRD, including the C–I<sup>+</sup>–C motif. The type of the supramolecular assembly was determined manually for each structure using Olex2-1.5 software.



## References

1. Bielawski, M.; Zhu, M.; Olofsson, B. Efficient and General One-Pot Synthesis of Diaryliodonium Triflates: Optimization, Scope and Limitations. *Adv. Synth. Catal.* **2007**, *349*, 2610–2618, doi:10.1002/adsc.200700373.
